# Supplementary material
Source: PubMed Central journal article supplement (PMC7027591)

# Web Appendix for “Design and analysis considerations for cohort stepped wedge cluster randomized trials with a decay correlation structure”

Fan Li\*

\*fan.f.li@yale.edu

## WEB APPENDIX A: CLOSED-FORM SOLUTIONS FOR $\alpha_0, \alpha_1$ FROM FIRST-STAGE QLS ESTIMATING EQUATIONS

We provide the closed-form solutions to  $\alpha_0, \alpha_1$  based on the first-stage QLS estimating equations. These expressions were first introduced by Shults and Morrow<sup>1</sup>, and we review them in our notations for cohort stepped wedge designs. Specifically, the first-stage estimator for  $\alpha_0$  is the solution to the scalar estimating equation

$$\sum_{i=1}^I \frac{\partial}{\partial \alpha_0} [r'_i(\theta) \{G_i^{-1}(\alpha_0) \otimes F^{-1}(\alpha_1)\} r_i(\theta)] = 0 \quad (1)$$

This is equivalent to solving for  $f(\alpha_0) = 0$ , where

$$f(\alpha_0) = \sum_{i=1}^I \left\{ [\alpha_0^2(N_i - 2)(N_i - 1) + 2\alpha_0(N_i - 1)] \sum_{j=1}^{N_i} r'_{ij}(\theta) F^{-1}(\alpha_1) r_{ij}(\theta) - 2[1 + \alpha_0^2(N_i - 1)] \sum_{j=1}^{N_i-1} \sum_{j'=j+1}^{N_i} r'_{ij}(\theta) F^{-1}(\alpha_1) r_{ij'}(\theta) \right\} / \left\{ (1 - \alpha_0)^2 [1 + (N_i - 1)\alpha_0]^2 \right\}$$

For balanced cohort size such that  $N_i = N$ , a closed-form expression for  $\alpha_0$  is

$$\alpha_0 = \frac{-(N - 1)a_1 + \sqrt{(N - 1)[(N - 1)a_1 - 2a_2](a_1 + 2a_2)}}{(N - 1)[a_1(N - 2) - 2a_2]}$$

where  $a_1 = \sum_{i=1}^I \sum_{j=1}^{N_i} r'_{ij}(\theta) F^{-1}(\alpha_1) r_{ij}(\theta)$ , and  $a_2 = \sum_{i=1}^I \sum_{j=1}^{N_i-1} \sum_{j'=j+1}^{N_i} r'_{ij}(\theta) F^{-1}(\alpha_1) r_{ij'}(\theta)$ . Similarly, the first-stage estimating equation for  $\alpha_1$

$$\sum_{i=1}^I \frac{\partial}{\partial \alpha_1} [r'_i(\theta) \{G_i^{-1}(\alpha_0) \otimes F^{-1}(\alpha_1)\} r_i(\theta)] = 0. \quad (2)$$

is equivalent to the following expression

$$\alpha_1 = \frac{b_m - \sqrt{b_m^2 - 4a_m^2}}{2a_m}$$

where

$$\begin{aligned} a_m &= \sum_{i=1}^I \left[ q_{i1} \sum_{j=1}^{N_i} \sum_{t=1}^{T-1} r_{ijt} r_{ij,t+1} + q_{i2} \sum_{j=1}^{N_i-1} \sum_{j'=j+1}^{N_i} \sum_{t=1}^{T-1} (r_{ijt} r_{ij',t+1} + r_{ij't} r_{ij,t+1}) \right] \\ b_m &= \sum_{i=1}^I \left[ q_{i1} \sum_{j=1}^{N_i} \sum_{t=1}^{T-1} (r_{ijt}^2 + r_{ij,t+1}^2) + 2q_{i2} \sum_{j=1}^{N_i-1} \sum_{j'=j+1}^{N_i} \sum_{t=1}^{T-1} (r_{ijt} r_{ij't} + r_{ij,t+1} r_{ij',t+1}) \right] \\ q_{i1} &= \frac{1 + (N_i - 2)\alpha_0}{(1 - \alpha_0)[1 + (N_i - 1)\alpha_0]} \\ q_{i2} &= \frac{-\alpha_0}{(1 - \alpha_0)[1 + (N_i - 1)\alpha_0]} \end{aligned}$$

## WEB APPENDIX B: MATRIX-ADJUSTED QLS ESTIMATING EQUATIONS

We justify the proposed matrix-adjusted correlation estimates as follows. Recall that the first-stage estimating equation (1) is equivalent to

$$0 = \sum_{i=1}^I \frac{\partial}{\partial \alpha_0} \text{tr} [\{G_i^{-1}(\alpha_0) \otimes F^{-1}(\alpha_1)\} r_i(\theta) r_i'(\theta)] \propto \sum_{i=1}^I \frac{\partial}{\partial \alpha_0} \text{tr} [\{G_i^{-1}(\alpha_0) \otimes F^{-1}(\alpha_1)\} \phi^{-1} r_i(\theta) r_i'(\theta)] \quad (3)$$

and  $\phi^{-1} r_i(\theta) r_i'(\theta)$  is the nonparametric moment estimator for the correlation matrix. Specifically when  $I$  is small, the estimated residual  $y_i - \hat{\mu}_i$  tends to be biased towards zero, and following Preisser et al.<sup>2</sup>, we have  $E[(y_i - \hat{\mu}_i)(y_i - \hat{\mu}_i)'] \approx (I - H_i) \text{cov}(y_i) = \phi(I - H_i) A_i^{1/2} \text{corr}(y_i) A_i^{1/2}$  and therefore  $E[r_i(\hat{\theta}) r_i'(\hat{\theta})] \approx \phi A_i^{-1/2} (I - H_i) A_i^{1/2} \text{corr}(y_i)$ . This last equation suggests that  $\phi^{-1} A_i^{-1/2} (I - H_i)^{-1} A_i^{1/2} r_i(\hat{\theta}) r_i'(\hat{\theta})$  is a better estimator for  $\text{corr}(y_i)$  compared to the simple cross-product  $\phi^{-1} r_i(\hat{\theta}) r_i'(\hat{\theta})$ , since the former accounts for finite-sample bias in a multiplicative fashion. Then we define the ‘‘matrix-adjusted’’ estimator  $\tilde{R}_i(\theta) = A_i^{-1/2} (I - H_i)^{-1} A_i^{1/2} r_i(\theta) r_i'(\theta)$  for the correlation matrix to replace the simple cross-product  $r_i(\theta) r_i'(\theta)$  in (3). See also the Web Appendix B of Li et al.<sup>3</sup> for a full exposition on related technical details. In other words, estimating equation (3) could be replaced by

$$\sum_{i=1}^I \frac{\partial}{\partial \alpha_0} \text{tr} [\{G_i^{-1}(\alpha_0) \otimes F^{-1}(\alpha_1)\} \tilde{R}_i(\theta)] = 0. \quad (4)$$

When the true correlation is the proportional decay structure, we provide the closed-form updates for the matrix-adjusted estimating equations. Write  $\tilde{R}_i(\theta)$  as a block matrix with each block  $\tilde{R}_{ijj}$  corresponding to the repeated measurements for the same individual

$$\tilde{R}_i(\theta) = \begin{pmatrix} \tilde{R}_{i11} & \tilde{R}_{i12} & \dots & \tilde{R}_{i1N_i} \\ \tilde{R}_{i21} & \tilde{R}_{i22} & \dots & \tilde{R}_{i2N_i} \\ \vdots & \vdots & \ddots & \vdots \\ \tilde{R}_{iN_i1} & \tilde{R}_{iN_i2} & \dots & \tilde{R}_{iN_iN_i} \end{pmatrix}.$$

After some simplification algebra, we could express  $\alpha_0$  as the solution to  $g(\alpha_0) = 0$ , where

$$g(\alpha_0) = \sum_{i=1}^I \left\{ [\alpha_0^2 (N_i - 2)(N_i - 1) + 2\alpha_0 (N_i - 1)] \sum_{j=1}^{N_i} \text{tr} (F^{-1}(\alpha_1) \tilde{R}_{ijj}) - [1 + \alpha_0^2 (N_i - 1)] \sum_{j \neq j'} \text{tr} (F^{-1}(\alpha_1) \tilde{R}_{ijj'}) \right\} / \left\{ (1 - \alpha_0)^2 [1 + (N_i - 1)\alpha_0]^2 \right\}$$

Similarly, we solve the following bias-corrected estimating equation for  $\alpha_1$

$$\sum_{i=1}^I \frac{\partial}{\partial \alpha_1} \text{tr} [\{G_i^{-1}(\alpha_0) \otimes F^{-1}(\alpha_1)\} \tilde{R}_i(\theta)] = 0. \quad (5)$$

Recall that  $F^{-1}(\rho) = (1 - \rho^2)^{-1} \{I + \rho^2 C_2 - \rho C_1\}$ ,  $C_2 = \text{diag}(0, 1, \dots, 1, 0)$  and  $C_1$  is a tridiagonal matrix with zeros on the main diagonal and ones on the two sub-diagonals. After some simplification algebra, we could express  $\alpha_1$  as

$$\alpha_1 = \frac{e_m - \sqrt{e_m^2 - d_m^2}}{d_m}$$

where

$$d_m = \sum_{i=1}^I \left[ q_{i1} \sum_{j=1}^{N_i} \text{tr} (C_1 \tilde{R}_{ijj}) + q_{i2} \sum_{j \neq j'} \text{tr} (C_1 \tilde{R}_{ijj'}) \right]$$

$$e_m = \sum_{i=1}^I \left[ q_{i1} \sum_{j=1}^{N_i} \text{tr} (\tilde{R}_{ijj}) + q_{i1} \sum_{j=1}^{N_i} \text{tr} (C_2 \tilde{R}_{ijj}) + q_{i2} \sum_{j \neq j'} \text{tr} (\tilde{R}_{ijj'}) + q_{i2} \sum_{j \neq j'} \text{tr} (C_2 \tilde{R}_{ijj'}) \right]$$

## WEB APPENDIX C: CLOSED-FORM VARIANCE OF THE INTERVENTION EFFECT UNDER THE PROPORTIONAL DECAY MODEL

Recall that the  $TN \times (T + 1)$  design matrix corresponding to cluster  $i$  as  $Z_i = 1_N \otimes (I_T, X_i)$ , where  $1_N$  is a  $N$ -vector of ones. The variance of the intervention effect  $\text{var}(\hat{\delta})$  equals to the lower-right element of  $\phi \left\{ \sum_{i=1}^I Z_i' R_i^{-1}(\tau, \rho) Z_i \right\}^{-1}$ , where  $\phi$  is the marginal variance or dispersion. Notice that

$$\sum_{i=1}^I Z_i' R_i^{-1} Z_i = \sum_{i=1}^I \left[ 1_N' \otimes \begin{pmatrix} I_T \\ X_i' \end{pmatrix} \right] (G_i^{-1}(\tau) \otimes F^{-1}(\rho)) [1_N \otimes (I_T \ X_i)] = \begin{bmatrix} \Lambda_{11} & \Lambda_{12} \\ \Lambda_{21} & \Lambda_{22} \end{bmatrix},$$

where  $\Lambda_{11}$  is of dimension  $T \times T$ ,  $\Lambda_{12} = \Lambda_{21}'$  is of dimension  $T \times 1$ , and  $\Lambda_{22}$  is a scalar. Define  $c = (1 - \tau)^{-1}$  and  $d = \tau / [(1 - \tau)\{1 + (N - 1)\tau\}]$ , and after some algebra, we obtain

$$\begin{aligned} \Lambda_{11} &= I(1_N' 1_N) \otimes (cF^{-1}) + I(1_N' J 1_N) \otimes (-dF^{-1}) = IN(c - Nd)F^{-1}, \\ \Lambda_{12} &= I(1_N' 1_N) \otimes \sum_{i=1}^I (cF^{-1})X_i + (1_N' J 1_N) \otimes \sum_{i=1}^I (-dF^{-1})X_i = N(c - Nd) \sum_{i=1}^I F^{-1} X_i, \end{aligned}$$

and  $\Lambda_{22} = N(c - Nd) \sum_{i=1}^I X_i' F^{-1} X_i$ . The variance of the intervention effect then becomes

$$\begin{aligned} \text{var}(\hat{\delta}) &= \phi(\Lambda_{22} - \Lambda_{21}\Lambda_{11}^{-1}\Lambda_{12})^{-1} \\ &= \phi \left\{ N(c - Nd) \sum_{i=1}^I X_i' F^{-1} X_i - I^{-1}N(c - Nd) \left( \sum_{i=1}^I X_i' F^{-1} \right) F \left( \sum_{i=1}^I F^{-1} X_i \right) \right\}^{-1} \\ &= \phi IN^{-1}(c - Nd)^{-1} \left\{ I \sum_{i=1}^I X_i' F^{-1} X_i - \left( \sum_{i=1}^I X_i' \right) F^{-1} \left( \sum_{i=1}^I X_i \right) \right\}^{-1}. \end{aligned}$$

The key terms are further expanded as

$$\begin{aligned} I \sum_{i=1}^I X_i' F^{-1} X_i &= (1 - \rho^2)^{-1} \left\{ I \sum_{i=1}^I (X_{i1} + X_{iT}) + I(1 + \rho^2) \sum_{i=2}^{T-2} X_{ii} - 2\rho IV \right\} \\ &= (1 - \rho^2)^{-1} \left\{ -I\rho^2 \sum_{i=1}^I (X_{i1} + X_{iT}) + (1 + \rho^2)IU - 2\rho IV \right\} \\ &= (1 - \rho^2)^{-1} \left\{ -I^2\rho^2 + (1 + \rho^2)IU - 2\rho IV \right\}, \end{aligned}$$

where  $U = \sum_{i=1}^I \sum_{t=1}^T X_{it}$  and  $V = \sum_{i=1}^I \sum_{t=1}^{T-1} X_{it} X_{i,t+1}$  are design constants that only depend on the stepped wedge assignment layout. The last equality holds because  $X_{i1} = 0$ ,  $X_{iT} = 1$  for all  $i$  in stepped wedge designs. In particular, the inner summation in  $V$  reflects the between-period autoregressive structure to the first order. Next,

$$\begin{aligned} \left( \sum_{i=1}^I X_i' \right) F^{-1} \left( \sum_{i=1}^I X_i \right) &= (1 - \rho^2)^{-1} \left\{ \left( \sum_{i=1}^I X_{i1} \right)^2 + \left( \sum_{i=1}^I X_{iT} \right)^2 + (1 + \rho^2) \sum_{i=2}^{T-1} \left( \sum_{i=1}^I X_{ii} \right)^2 - 2\rho Q \right\} \\ &= (1 - \rho^2)^{-1} \left\{ -\rho^2 \left( \sum_{i=1}^I X_{i1} \right)^2 - \rho^2 \left( \sum_{i=1}^I X_{iT} \right)^2 + (1 + \rho^2)W - 2\rho Q \right\} \\ &= (1 - \rho^2)^{-1} \left\{ -I^2\rho^2 + (1 + \rho^2)W - 2\rho Q \right\}, \end{aligned}$$

where the design constants  $W = \sum_{i=1}^I \left( \sum_{t=1}^T X_{it} \right)^2$  and  $Q = \sum_{i=1}^{T-1} \left( \sum_{i=1}^I X_{it} \right) \left( \sum_{i=1}^I X_{i,t+1} \right)$ . Again, the outer summation in  $Q$  reflects the between-period autoregressive structure to the first order. Further note

$$c - Nd = \frac{1}{1 - \tau} - \frac{N\tau}{(1 - \tau)\{1 + (N - 1)\tau\}} = \frac{1}{1 + (N - 1)\tau}$$

Some further algebra leads to the following closed-form variance expression in Section 4.1 of the main text,

$$\text{var}(\hat{\delta}) = \frac{(\phi I/N)(1 - \rho^2)\{1 + (N - 1)\tau\}}{(IU - W)(1 + \rho^2) - 2(IV - Q)\rho}.$$

---

**WEB APPENDIX D: WEB TABLES**

**Web Table 1** Convergence rates (out of 10000) for quasi-least squares (QLS) and matrix-adjusted quasi-least squares (MAQLS) analyses of simulated outcome data when the treatment effect is zero.

| Correlations |        | Effect size | Design resource |     |     | Convergence (%) |       |
|--------------|--------|-------------|-----------------|-----|-----|-----------------|-------|
| $\tau$       | $\rho$ | $\delta$    | $I$             | $N$ | $T$ | QLS             | MAQLS |
| 0.03         | 0.2    | 0.3         | 18              | 10  | 7   | 100.0           | 98.3  |
| 0.03         | 0.2    | 0.3         | 18              | 24  | 4   | 100.0           | 99.4  |
| 0.03         | 0.2    | 0.3         | 20              | 14  | 5   | 100.0           | 98.9  |
| 0.03         | 0.2    | 0.4         | 21              | 8   | 4   | 100.0           | 100.0 |
| 0.03         | 0.2    | 0.5         | 15              | 8   | 4   | 100.0           | 100.0 |
| 0.03         | 0.8    | 0.2         | 16              | 12  | 5   | 99.9            | 99.2  |
| 0.03         | 0.8    | 0.2         | 24              | 7   | 5   | 100.0           | 99.8  |
| 0.03         | 0.8    | 0.3         | 12              | 8   | 5   | 99.8            | 98.2  |
| 0.03         | 0.8    | 0.4         | 12              | 5   | 4   | 99.8            | 98.0  |
| 0.03         | 0.8    | 0.5         | 10              | 5   | 3   | 99.8            | 98.4  |
| 0.10         | 0.2    | 0.3         | 21              | 11  | 8   | 100.0           | 99.8  |
| 0.10         | 0.2    | 0.3         | 24              | 11  | 7   | 100.0           | 99.9  |
| 0.10         | 0.2    | 0.4         | 15              | 16  | 6   | 100.0           | 98.4  |
| 0.10         | 0.2    | 0.4         | 18              | 8   | 7   | 100.0           | 100.0 |
| 0.10         | 0.2    | 0.5         | 16              | 7   | 5   | 100.0           | 100.0 |
| 0.10         | 0.8    | 0.2         | 20              | 18  | 5   | 100.0           | 99.7  |
| 0.10         | 0.8    | 0.3         | 15              | 9   | 4   | 100.0           | 100.0 |
| 0.10         | 0.8    | 0.4         | 10              | 20  | 3   | 100.0           | 97.0  |
| 0.10         | 0.8    | 0.4         | 12              | 5   | 5   | 100.0           | 99.5  |
| 0.10         | 0.8    | 0.5         | 9               | 7   | 4   | 100.0           | 99.5  |

**Web Table 2** Convergence rates (out of 10000) for quasi-least squares (QLS) and matrix-adjusted quasi-least squares (MAQLS) analyses of simulated outcome data when the treatment effect is nonzero.

| Correlations |        | Effect size | Design resource |     |     | Convergence (%) |       |
|--------------|--------|-------------|-----------------|-----|-----|-----------------|-------|
| $\tau$       | $\rho$ | $\delta$    | $I$             | $N$ | $T$ | QLS             | MAQLS |
| 0.03         | 0.2    | 0.3         | 18              | 10  | 7   | 100.0           | 98.3  |
| 0.03         | 0.2    | 0.3         | 18              | 24  | 4   | 100.0           | 99.4  |
| 0.03         | 0.2    | 0.3         | 20              | 14  | 5   | 100.0           | 98.9  |
| 0.03         | 0.2    | 0.4         | 21              | 8   | 4   | 100.0           | 100.0 |
| 0.03         | 0.2    | 0.5         | 15              | 8   | 4   | 100.0           | 100.0 |
| 0.03         | 0.8    | 0.2         | 16              | 12  | 5   | 99.9            | 99.2  |
| 0.03         | 0.8    | 0.2         | 24              | 7   | 5   | 100.0           | 99.8  |
| 0.03         | 0.8    | 0.3         | 12              | 8   | 5   | 99.8            | 98.2  |
| 0.03         | 0.8    | 0.4         | 12              | 5   | 4   | 99.8            | 98.0  |
| 0.03         | 0.8    | 0.5         | 10              | 5   | 3   | 99.8            | 98.4  |
| 0.10         | 0.2    | 0.3         | 21              | 11  | 8   | 100.0           | 99.8  |
| 0.10         | 0.2    | 0.3         | 24              | 11  | 7   | 100.0           | 99.9  |
| 0.10         | 0.2    | 0.4         | 15              | 16  | 6   | 100.0           | 98.4  |
| 0.10         | 0.2    | 0.4         | 18              | 8   | 7   | 100.0           | 100.0 |
| 0.10         | 0.2    | 0.5         | 16              | 7   | 5   | 100.0           | 100.0 |
| 0.10         | 0.8    | 0.2         | 20              | 18  | 5   | 100.0           | 99.7  |
| 0.10         | 0.8    | 0.3         | 15              | 9   | 4   | 100.0           | 100.0 |
| 0.10         | 0.8    | 0.4         | 10              | 20  | 3   | 100.0           | 97.0  |
| 0.10         | 0.8    | 0.4         | 12              | 5   | 5   | 100.0           | 99.5  |
| 0.10         | 0.8    | 0.5         | 9               | 7   | 4   | 100.0           | 99.5  |

**Web Table 3** Percent relative bias of the correlation parameters based on quasi-least squares (QLS) and matrix-adjusted quasi-least squares (MAQLS) for each simulation scenario when the treatment effect is nonzero.

| Correlations |        | Effect size | Design resource |     |     | Percent bias for $\tau$ |       | Percent bias for $\rho$ |       |
|--------------|--------|-------------|-----------------|-----|-----|-------------------------|-------|-------------------------|-------|
| $\tau$       | $\rho$ | $\delta$    | $I$             | $N$ | $T$ | QLS                     | MAQLS | QLS                     | MAQLS |
| 0.03         | 0.2    | 0.3         | 18              | 10  | 7   | -26.6                   | 3.6   | -0.6                    | 0.2   |
| 0.03         | 0.2    | 0.3         | 18              | 24  | 4   | -16.0                   | 5.5   | -0.3                    | 0.0   |
| 0.03         | 0.2    | 0.3         | 20              | 14  | 5   | -20.2                   | 3.4   | -0.5                    | 0.1   |
| 0.03         | 0.2    | 0.4         | 21              | 8   | 4   | -29.4                   | 3.2   | -0.4                    | 0.2   |
| 0.03         | 0.2    | 0.5         | 15              | 8   | 4   | -41.3                   | 4.7   | -0.7                    | 0.3   |
| 0.03         | 0.8    | 0.2         | 16              | 12  | 5   | -26.2                   | 4.4   | -0.6                    | 0.0   |
| 0.03         | 0.8    | 0.2         | 24              | 7   | 5   | -27.6                   | 0.7   | -0.6                    | -0.1  |
| 0.03         | 0.8    | 0.3         | 12              | 8   | 5   | -49.4                   | 8.4   | -2.1                    | -0.3  |
| 0.03         | 0.8    | 0.4         | 12              | 5   | 4   | -74.4                   | 6.4   | -2.3                    | -0.5  |
| 0.03         | 0.8    | 0.5         | 10              | 5   | 3   | -92.2                   | -0.6  | -1.6                    | -0.5  |
| 0.10         | 0.2    | 0.3         | 21              | 11  | 8   | -9.2                    | 3.9   | -0.6                    | 0.6   |
| 0.10         | 0.2    | 0.3         | 24              | 11  | 7   | -8.1                    | 3.4   | -0.4                    | 0.6   |
| 0.10         | 0.2    | 0.4         | 15              | 16  | 6   | -11.8                   | 7.1   | -0.6                    | 1.1   |
| 0.10         | 0.2    | 0.4         | 18              | 8   | 7   | -12.7                   | 3.9   | -0.8                    | 0.7   |
| 0.10         | 0.2    | 0.5         | 16              | 7   | 5   | -16.7                   | 3.7   | -0.7                    | 1.0   |
| 0.10         | 0.8    | 0.2         | 20              | 18  | 5   | -8.0                    | 4.9   | -0.1                    | 0.2   |
| 0.10         | 0.8    | 0.3         | 15              | 9   | 4   | -15.2                   | 3.1   | -0.2                    | 0.2   |
| 0.10         | 0.8    | 0.4         | 10              | 20  | 3   | -16.9                   | 6.4   | -0.1                    | 0.3   |
| 0.10         | 0.8    | 0.4         | 12              | 5   | 5   | -27.0                   | 2.6   | -1.5                    | 0.0   |
| 0.10         | 0.8    | 0.5         | 9               | 7   | 4   | -29.7                   | 3.9   | -1.0                    | 0.1   |

**Web Table 4** Simulation scenarios, nominal size, along with the empirical type I error rates corresponding to the QLS z-tests and MAQLS z-test with different variance estimators. Empirical type I error rates between 0.045 and 0.055 are considered acceptable based on the margin of error from a binomial model with 10000 Monte Carlo replications.

| $\tau$ | $\rho$ | $\delta$ | $I$ | $N$ | $T$ | Pred <sup>a</sup> | MB <sup>b</sup> |       |       | BC0 <sup>c</sup> |       |       | BC1 <sup>d</sup> |       |       | BC2 <sup>e</sup> |       |       | BC3 <sup>f</sup> |       |       |       |       |
|--------|--------|----------|-----|-----|-----|-------------------|-----------------|-------|-------|------------------|-------|-------|------------------|-------|-------|------------------|-------|-------|------------------|-------|-------|-------|-------|
|        |        |          |     |     |     |                   | QLS             | MAQLS | MAQLS | QLS              | MAQLS | MAQLS | QLS              | MAQLS | MAQLS | QLS              | MAQLS | MAQLS | QLS              | MAQLS | MAQLS | QLS   | MAQLS |
| 0.03   | 0.2    | 0        | 18  | 10  | 7   | 0.050             | 0.056           | 0.048 | 0.084 | 0.084            | 0.084 | 0.068 | 0.068            | 0.051 | 0.051 | 0.051            | 0.051 | 0.051 | 0.051            | 0.051 | 0.070 | 0.070 | 0.071 |
| 0.03   | 0.2    | 0        | 18  | 24  | 4   | 0.050             | 0.061           | 0.049 | 0.081 | 0.081            | 0.081 | 0.066 | 0.065            | 0.051 | 0.051 | 0.050            | 0.050 | 0.050 | 0.050            | 0.050 | 0.066 | 0.066 | 0.065 |
| 0.03   | 0.2    | 0        | 20  | 14  | 5   | 0.050             | 0.061           | 0.051 | 0.083 | 0.083            | 0.083 | 0.069 | 0.069            | 0.058 | 0.058 | 0.058            | 0.058 | 0.058 | 0.058            | 0.070 | 0.070 | 0.070 |       |
| 0.03   | 0.2    | 0        | 21  | 8   | 4   | 0.050             | 0.061           | 0.052 | 0.079 | 0.079            | 0.079 | 0.066 | 0.066            | 0.053 | 0.053 | 0.053            | 0.053 | 0.053 | 0.053            | 0.066 | 0.066 | 0.066 |       |
| 0.03   | 0.2    | 0        | 15  | 8   | 4   | 0.050             | 0.070           | 0.057 | 0.096 | 0.096            | 0.096 | 0.077 | 0.077            | 0.058 | 0.058 | 0.058            | 0.058 | 0.058 | 0.058            | 0.077 | 0.077 | 0.077 |       |
| 0.03   | 0.8    | 0        | 16  | 12  | 5   | 0.050             | 0.066           | 0.056 | 0.091 | 0.091            | 0.091 | 0.074 | 0.073            | 0.056 | 0.056 | 0.056            | 0.056 | 0.056 | 0.056            | 0.074 | 0.074 | 0.073 |       |
| 0.03   | 0.8    | 0        | 24  | 7   | 5   | 0.050             | 0.059           | 0.053 | 0.078 | 0.078            | 0.078 | 0.066 | 0.066            | 0.056 | 0.056 | 0.055            | 0.055 | 0.055 | 0.055            | 0.067 | 0.067 | 0.066 |       |
| 0.03   | 0.8    | 0        | 12  | 8   | 5   | 0.050             | 0.071           | 0.060 | 0.109 | 0.109            | 0.106 | 0.081 | 0.079            | 0.059 | 0.058 | 0.058            | 0.058 | 0.058 | 0.058            | 0.082 | 0.082 | 0.079 |       |
| 0.03   | 0.8    | 0        | 12  | 5   | 4   | 0.050             | 0.067           | 0.057 | 0.104 | 0.104            | 0.103 | 0.079 | 0.078            | 0.058 | 0.057 | 0.057            | 0.057 | 0.057 | 0.057            | 0.076 | 0.076 | 0.075 |       |
| 0.03   | 0.8    | 0        | 10  | 5   | 3   | 0.050             | 0.074           | 0.063 | 0.113 | 0.113            | 0.112 | 0.083 | 0.082            | 0.057 | 0.056 | 0.056            | 0.056 | 0.056 | 0.056            | 0.072 | 0.072 | 0.071 |       |
| 0.10   | 0.2    | 0        | 21  | 11  | 8   | 0.050             | 0.060           | 0.050 | 0.081 | 0.081            | 0.081 | 0.069 | 0.069            | 0.057 | 0.057 | 0.057            | 0.057 | 0.057 | 0.057            | 0.070 | 0.070 | 0.070 |       |
| 0.10   | 0.2    | 0        | 24  | 11  | 7   | 0.050             | 0.060           | 0.051 | 0.076 | 0.076            | 0.077 | 0.064 | 0.064            | 0.053 | 0.053 | 0.053            | 0.053 | 0.053 | 0.053            | 0.065 | 0.065 | 0.065 |       |
| 0.10   | 0.2    | 0        | 15  | 16  | 6   | 0.050             | 0.062           | 0.048 | 0.098 | 0.098            | 0.097 | 0.075 | 0.075            | 0.058 | 0.057 | 0.057            | 0.057 | 0.057 | 0.057            | 0.078 | 0.078 | 0.078 |       |
| 0.10   | 0.2    | 0        | 18  | 8   | 7   | 0.050             | 0.059           | 0.048 | 0.087 | 0.087            | 0.088 | 0.071 | 0.071            | 0.056 | 0.056 | 0.056            | 0.056 | 0.056 | 0.056            | 0.073 | 0.073 | 0.073 |       |
| 0.10   | 0.2    | 0        | 16  | 7   | 5   | 0.050             | 0.065           | 0.052 | 0.091 | 0.091            | 0.091 | 0.072 | 0.072            | 0.055 | 0.055 | 0.055            | 0.055 | 0.055 | 0.055            | 0.073 | 0.073 | 0.073 |       |
| 0.10   | 0.8    | 0        | 20  | 18  | 5   | 0.050             | 0.062           | 0.053 | 0.079 | 0.079            | 0.079 | 0.064 | 0.064            | 0.052 | 0.052 | 0.052            | 0.052 | 0.052 | 0.052            | 0.065 | 0.065 | 0.065 |       |
| 0.10   | 0.8    | 0        | 15  | 9   | 4   | 0.050             | 0.065           | 0.055 | 0.091 | 0.091            | 0.091 | 0.072 | 0.072            | 0.053 | 0.053 | 0.053            | 0.053 | 0.053 | 0.053            | 0.070 | 0.070 | 0.070 |       |
| 0.10   | 0.8    | 0        | 10  | 20  | 3   | 0.050             | 0.076           | 0.056 | 0.116 | 0.116            | 0.117 | 0.084 | 0.085            | 0.060 | 0.060 | 0.060            | 0.060 | 0.060 | 0.060            | 0.073 | 0.073 | 0.074 |       |
| 0.10   | 0.8    | 0        | 12  | 5   | 5   | 0.050             | 0.069           | 0.058 | 0.105 | 0.105            | 0.105 | 0.079 | 0.079            | 0.058 | 0.057 | 0.057            | 0.057 | 0.057 | 0.057            | 0.080 | 0.080 | 0.079 |       |
| 0.10   | 0.8    | 0        | 9   | 7   | 4   | 0.050             | 0.076           | 0.060 | 0.122 | 0.122            | 0.120 | 0.088 | 0.086            | 0.058 | 0.057 | 0.057            | 0.057 | 0.057 | 0.057            | 0.084 | 0.084 | 0.083 |       |

<sup>a</sup> Pred: Nominal type I error rate.

<sup>b</sup> MB: Model-based variance.

<sup>c</sup> BC0: Uncorrected sandwich variance of Liang and Zeger (1986).

<sup>d</sup> BC1: Bias-corrected sandwich variance of Kauermann and Carroll (2001).

<sup>e</sup> BC2: Bias-corrected sandwich variance of Mancl and DeRouen (2001).

<sup>f</sup> BC3: Bias-corrected sandwich variance of Fay and Graubard (2001).

**Web Table 5** Simulation scenarios, nominal size, along with the empirical type I error rates corresponding to the QLS  $t$ -tests and MAQLS  $t$ -test with different variance estimators. The degrees of freedom is set to be  $\text{DoF} = I - 2$ . Empirical type I error rates between 0.045 and 0.055 are considered acceptable based on the margin of error from a binomial model with 10000 Monte Carlo replications.

| $\tau$ | $\rho$ | $\delta$ | $I$ | $N$ | $T$ | Pred <sup>a</sup> | MB <sup>b</sup> |       |       | BC0 <sup>c</sup> |       |       | BC1 <sup>d</sup> |       |       | BC2 <sup>e</sup> |       |       | BC3 <sup>f</sup> |       |       |       |       |
|--------|--------|----------|-----|-----|-----|-------------------|-----------------|-------|-------|------------------|-------|-------|------------------|-------|-------|------------------|-------|-------|------------------|-------|-------|-------|-------|
|        |        |          |     |     |     |                   | QLS             | MAQLS | MAQLS | QLS              | MAQLS | MAQLS | QLS              | MAQLS | MAQLS | QLS              | MAQLS | MAQLS | QLS              | MAQLS | MAQLS | QLS   | MAQLS |
| 0.03   | 0.2    | 0        | 18  | 10  | 7   | 0.050             | 0.041           | 0.034 | 0.063 | 0.063            | 0.063 | 0.047 | 0.047            | 0.038 | 0.038 | 0.038            | 0.038 | 0.038 | 0.038            | 0.038 | 0.049 | 0.049 | 0.049 |
| 0.03   | 0.2    | 0        | 18  | 24  | 4   | 0.050             | 0.043           | 0.034 | 0.061 | 0.060            | 0.060 | 0.048 | 0.047            | 0.036 | 0.036 | 0.036            | 0.036 | 0.036 | 0.036            | 0.036 | 0.047 | 0.047 | 0.047 |
| 0.03   | 0.2    | 0        | 20  | 14  | 5   | 0.050             | 0.044           | 0.038 | 0.065 | 0.065            | 0.065 | 0.054 | 0.054            | 0.044 | 0.044 | 0.044            | 0.044 | 0.044 | 0.044            | 0.055 | 0.055 | 0.055 |       |
| 0.03   | 0.2    | 0        | 21  | 8   | 4   | 0.050             | 0.045           | 0.038 | 0.061 | 0.061            | 0.061 | 0.050 | 0.050            | 0.040 | 0.040 | 0.040            | 0.040 | 0.040 | 0.040            | 0.049 | 0.049 | 0.049 |       |
| 0.03   | 0.2    | 0        | 15  | 8   | 4   | 0.050             | 0.045           | 0.037 | 0.070 | 0.070            | 0.070 | 0.053 | 0.053            | 0.041 | 0.041 | 0.041            | 0.041 | 0.041 | 0.041            | 0.053 | 0.053 | 0.053 |       |
| 0.03   | 0.8    | 0        | 16  | 12  | 5   | 0.050             | 0.044           | 0.038 | 0.068 | 0.067            | 0.067 | 0.051 | 0.051            | 0.038 | 0.038 | 0.038            | 0.038 | 0.038 | 0.038            | 0.051 | 0.051 | 0.051 |       |
| 0.03   | 0.8    | 0        | 24  | 7   | 5   | 0.050             | 0.047           | 0.043 | 0.063 | 0.062            | 0.062 | 0.053 | 0.052            | 0.043 | 0.043 | 0.043            | 0.043 | 0.043 | 0.043            | 0.053 | 0.053 | 0.053 |       |
| 0.03   | 0.8    | 0        | 12  | 8   | 5   | 0.050             | 0.043           | 0.035 | 0.072 | 0.070            | 0.070 | 0.051 | 0.049            | 0.034 | 0.032 | 0.032            | 0.032 | 0.032 | 0.032            | 0.050 | 0.050 | 0.050 |       |
| 0.03   | 0.8    | 0        | 12  | 5   | 4   | 0.050             | 0.040           | 0.034 | 0.070 | 0.069            | 0.069 | 0.051 | 0.050            | 0.036 | 0.035 | 0.035            | 0.035 | 0.035 | 0.035            | 0.049 | 0.049 | 0.049 |       |
| 0.03   | 0.8    | 0        | 10  | 5   | 3   | 0.050             | 0.038           | 0.030 | 0.070 | 0.070            | 0.070 | 0.047 | 0.046            | 0.032 | 0.031 | 0.031            | 0.031 | 0.031 | 0.031            | 0.038 | 0.038 | 0.038 |       |
| 0.10   | 0.2    | 0        | 21  | 11  | 8   | 0.050             | 0.044           | 0.038 | 0.066 | 0.066            | 0.066 | 0.053 | 0.053            | 0.043 | 0.044 | 0.044            | 0.044 | 0.044 | 0.044            | 0.056 | 0.056 | 0.056 |       |
| 0.10   | 0.2    | 0        | 24  | 11  | 7   | 0.050             | 0.044           | 0.038 | 0.061 | 0.061            | 0.061 | 0.051 | 0.051            | 0.043 | 0.043 | 0.043            | 0.043 | 0.043 | 0.043            | 0.052 | 0.052 | 0.052 |       |
| 0.10   | 0.2    | 0        | 15  | 16  | 6   | 0.050             | 0.041           | 0.031 | 0.069 | 0.068            | 0.068 | 0.052 | 0.052            | 0.040 | 0.040 | 0.040            | 0.040 | 0.040 | 0.040            | 0.053 | 0.053 | 0.053 |       |
| 0.10   | 0.2    | 0        | 18  | 8   | 7   | 0.050             | 0.040           | 0.034 | 0.067 | 0.067            | 0.067 | 0.053 | 0.052            | 0.040 | 0.040 | 0.040            | 0.040 | 0.040 | 0.040            | 0.054 | 0.054 | 0.054 |       |
| 0.10   | 0.2    | 0        | 16  | 7   | 5   | 0.050             | 0.044           | 0.034 | 0.065 | 0.066            | 0.066 | 0.051 | 0.051            | 0.038 | 0.038 | 0.038            | 0.038 | 0.038 | 0.038            | 0.052 | 0.052 | 0.052 |       |
| 0.10   | 0.8    | 0        | 20  | 18  | 5   | 0.050             | 0.046           | 0.038 | 0.061 | 0.061            | 0.061 | 0.048 | 0.048            | 0.039 | 0.039 | 0.039            | 0.039 | 0.039 | 0.039            | 0.048 | 0.048 | 0.048 |       |
| 0.10   | 0.8    | 0        | 15  | 9   | 4   | 0.050             | 0.044           | 0.037 | 0.066 | 0.066            | 0.066 | 0.048 | 0.048            | 0.037 | 0.037 | 0.037            | 0.037 | 0.037 | 0.037            | 0.046 | 0.046 | 0.046 |       |
| 0.10   | 0.8    | 0        | 10  | 20  | 3   | 0.050             | 0.038           | 0.028 | 0.072 | 0.073            | 0.073 | 0.049 | 0.049            | 0.030 | 0.030 | 0.030            | 0.030 | 0.030 | 0.030            | 0.040 | 0.040 | 0.040 |       |
| 0.10   | 0.8    | 0        | 12  | 5   | 5   | 0.050             | 0.041           | 0.033 | 0.070 | 0.069            | 0.069 | 0.050 | 0.049            | 0.034 | 0.033 | 0.033            | 0.033 | 0.033 | 0.033            | 0.049 | 0.049 | 0.049 |       |
| 0.10   | 0.8    | 0        | 9   | 7   | 4   | 0.050             | 0.038           | 0.028 | 0.074 | 0.072            | 0.072 | 0.048 | 0.047            | 0.030 | 0.029 | 0.029            | 0.029 | 0.029 | 0.029            | 0.046 | 0.046 | 0.046 |       |

<sup>a</sup> Pred: Nominal type I error rate.

<sup>b</sup> MB: Model-based variance.

<sup>c</sup> BC0: Uncorrected sandwich variance of Liang and Zeger (1986).

<sup>d</sup> BC1: Bias-corrected sandwich variance of Kauermann and Carroll (2001).

<sup>e</sup> BC2: Bias-corrected sandwich variance of Mancl and DeRouen (2001).

<sup>f</sup> BC3: Bias-corrected sandwich variance of Fay and Graubard (2001).



**Web Table 6** Simulation scenarios, nominal size, along with the empirical type I error rates corresponding to the QLS  $t$ -tests and MAQLS  $t$ -test with different variance estimators. The degrees of freedom is set to be  $\text{DoF} = I - (T + 1)$ . Empirical type I error rates between 0.045 and 0.055 are considered acceptable based on the margin of error from a binomial model with 10000 Monte Carlo replications.

| $\tau$ | $\rho$ | $\delta$ | $I$ | $N$ | $T$ | Pred <sup>a</sup> | MB <sup>b</sup> |       |       | BC0 <sup>c</sup> |       |       | BC1 <sup>d</sup> |       |       | BC2 <sup>e</sup> |       |       | BC3 <sup>f</sup> |       |       |       |       |
|--------|--------|----------|-----|-----|-----|-------------------|-----------------|-------|-------|------------------|-------|-------|------------------|-------|-------|------------------|-------|-------|------------------|-------|-------|-------|-------|
|        |        |          |     |     |     |                   | QLS             | MAQLS | MAQLS | QLS              | MAQLS | MAQLS | QLS              | MAQLS | MAQLS | QLS              | MAQLS | MAQLS | QLS              | MAQLS | MAQLS | QLS   | MAQLS |
| 0.03   | 0.2    | 0        | 18  | 10  | 7   | 0.050             | 0.032           | 0.026 | 0.049 | 0.050            | 0.040 | 0.040 | 0.032            | 0.032 | 0.041 | 0.041            | 0.041 | 0.032 | 0.032            | 0.032 | 0.041 | 0.041 | 0.041 |
| 0.03   | 0.2    | 0        | 18  | 24  | 4   | 0.050             | 0.040           | 0.031 | 0.056 | 0.055            | 0.043 | 0.043 | 0.034            | 0.034 | 0.043 | 0.043            | 0.043 | 0.034 | 0.034            | 0.034 | 0.043 | 0.043 | 0.043 |
| 0.03   | 0.2    | 0        | 20  | 14  | 5   | 0.050             | 0.040           | 0.033 | 0.062 | 0.062            | 0.050 | 0.051 | 0.040            | 0.040 | 0.051 | 0.051            | 0.040 | 0.040 | 0.040            | 0.051 | 0.051 | 0.051 |       |
| 0.03   | 0.2    | 0        | 21  | 8   | 4   | 0.050             | 0.042           | 0.035 | 0.058 | 0.058            | 0.047 | 0.047 | 0.037            | 0.037 | 0.047 | 0.047            | 0.037 | 0.037 | 0.037            | 0.047 | 0.047 | 0.047 |       |
| 0.03   | 0.2    | 0        | 15  | 8   | 4   | 0.050             | 0.039           | 0.030 | 0.063 | 0.063            | 0.048 | 0.048 | 0.036            | 0.036 | 0.047 | 0.047            | 0.036 | 0.036 | 0.036            | 0.047 | 0.047 | 0.047 |       |
| 0.03   | 0.8    | 0        | 16  | 12  | 5   | 0.050             | 0.038           | 0.031 | 0.058 | 0.058            | 0.044 | 0.044 | 0.034            | 0.034 | 0.044 | 0.044            | 0.034 | 0.034 | 0.033            | 0.044 | 0.044 | 0.044 |       |
| 0.03   | 0.8    | 0        | 24  | 7   | 5   | 0.050             | 0.044           | 0.041 | 0.060 | 0.059            | 0.050 | 0.049 | 0.041            | 0.041 | 0.049 | 0.049            | 0.041 | 0.041 | 0.041            | 0.049 | 0.049 | 0.049 |       |
| 0.03   | 0.8    | 0        | 12  | 8   | 5   | 0.050             | 0.028           | 0.021 | 0.051 | 0.049            | 0.034 | 0.032 | 0.023            | 0.022 | 0.032 | 0.032            | 0.023 | 0.022 | 0.022            | 0.032 | 0.032 | 0.032 |       |
| 0.03   | 0.8    | 0        | 12  | 5   | 4   | 0.050             | 0.031           | 0.026 | 0.056 | 0.055            | 0.042 | 0.041 | 0.028            | 0.027 | 0.040 | 0.040            | 0.028 | 0.027 | 0.027            | 0.039 | 0.039 | 0.039 |       |
| 0.03   | 0.8    | 0        | 10  | 5   | 3   | 0.050             | 0.028           | 0.022 | 0.057 | 0.057            | 0.038 | 0.037 | 0.025            | 0.025 | 0.033 | 0.033            | 0.025 | 0.025 | 0.025            | 0.032 | 0.032 | 0.032 |       |
| 0.10   | 0.2    | 0        | 21  | 11  | 8   | 0.050             | 0.037           | 0.032 | 0.056 | 0.056            | 0.046 | 0.046 | 0.035            | 0.035 | 0.046 | 0.046            | 0.035 | 0.035 | 0.035            | 0.046 | 0.046 | 0.046 |       |
| 0.10   | 0.2    | 0        | 24  | 11  | 7   | 0.050             | 0.041           | 0.034 | 0.056 | 0.057            | 0.048 | 0.048 | 0.039            | 0.039 | 0.048 | 0.048            | 0.039 | 0.039 | 0.039            | 0.048 | 0.048 | 0.048 |       |
| 0.10   | 0.2    | 0        | 15  | 16  | 6   | 0.050             | 0.031           | 0.021 | 0.055 | 0.054            | 0.042 | 0.041 | 0.030            | 0.030 | 0.041 | 0.041            | 0.030 | 0.030 | 0.030            | 0.042 | 0.042 | 0.042 |       |
| 0.10   | 0.2    | 0        | 18  | 8   | 7   | 0.050             | 0.033           | 0.025 | 0.055 | 0.055            | 0.042 | 0.042 | 0.032            | 0.032 | 0.042 | 0.042            | 0.032 | 0.032 | 0.032            | 0.044 | 0.044 | 0.044 |       |
| 0.10   | 0.2    | 0        | 16  | 7   | 5   | 0.050             | 0.036           | 0.027 | 0.057 | 0.058            | 0.043 | 0.043 | 0.031            | 0.032 | 0.043 | 0.043            | 0.031 | 0.032 | 0.032            | 0.044 | 0.044 | 0.044 |       |
| 0.10   | 0.8    | 0        | 20  | 18  | 5   | 0.050             | 0.042           | 0.034 | 0.056 | 0.056            | 0.044 | 0.044 | 0.035            | 0.035 | 0.044 | 0.044            | 0.035 | 0.035 | 0.035            | 0.044 | 0.044 | 0.044 |       |
| 0.10   | 0.8    | 0        | 15  | 9   | 4   | 0.050             | 0.038           | 0.032 | 0.057 | 0.057            | 0.042 | 0.042 | 0.032            | 0.032 | 0.042 | 0.042            | 0.032 | 0.032 | 0.032            | 0.041 | 0.041 | 0.041 |       |
| 0.10   | 0.8    | 0        | 10  | 20  | 3   | 0.050             | 0.029           | 0.022 | 0.060 | 0.061            | 0.037 | 0.038 | 0.024            | 0.024 | 0.031 | 0.031            | 0.024 | 0.024 | 0.024            | 0.031 | 0.031 | 0.031 |       |
| 0.10   | 0.8    | 0        | 12  | 5   | 5   | 0.050             | 0.026           | 0.021 | 0.049 | 0.049            | 0.034 | 0.033 | 0.023            | 0.022 | 0.033 | 0.033            | 0.023 | 0.022 | 0.022            | 0.033 | 0.033 | 0.033 |       |
| 0.10   | 0.8    | 0        | 9   | 7   | 4   | 0.050             | 0.017           | 0.011 | 0.042 | 0.041            | 0.026 | 0.025 | 0.015            | 0.015 | 0.025 | 0.025            | 0.015 | 0.015 | 0.015            | 0.025 | 0.025 | 0.024 |       |

<sup>a</sup> Pred: Nominal type I error rate.

<sup>b</sup> MB: Model-based variance.

<sup>c</sup> BC0: Uncorrected sandwich variance of Liang and Zeger (1986).

<sup>d</sup> BC1: Bias-corrected sandwich variance of Kauermann and Carroll (2001).

<sup>e</sup> BC2: Bias-corrected sandwich variance of Mancl and DeRouen (2001).

<sup>f</sup> BC3: Bias-corrected sandwich variance of Fay and Graubard (2001).

**Web Table 7** Simulation scenarios, predicted power, along with the empirical power corresponding to the QLS z-tests and MAQLS z-test with different variance estimators. Differences from the prediction within 0.008 are considered acceptable based on the margin of error from a binomial model with 10000 Monte Carlo replications.

| $\tau$ | $\rho$ | $\delta$ | $I$ | $N$ | $T$ | Pred <sup>a</sup> | MB <sup>b</sup> |       |       | BC0 <sup>c</sup> |       |       | BC1 <sup>d</sup> |       |       | BC2 <sup>e</sup> |       |       | BC3 <sup>f</sup> |       |     |
|--------|--------|----------|-----|-----|-----|-------------------|-----------------|-------|-------|------------------|-------|-------|------------------|-------|-------|------------------|-------|-------|------------------|-------|-----|
|        |        |          |     |     |     |                   | QLS             | MAQLS | QLS   | MAQLS            | QLS   | MAQLS | QLS              | MAQLS | QLS   | MAQLS            | QLS   | MAQLS | QLS              | MAQLS | QLS |
| 0.03   | 0.2    | 0.3      | 18  | 10  | 7   | 0.899             | 0.907           | 0.894 | 0.910 | 0.910            | 0.910 | 0.889 | 0.889            | 0.865 | 0.866 | 0.890            | 0.890 |       |                  |       |     |
| 0.03   | 0.2    | 0.3      | 18  | 24  | 4   | 0.886             | 0.898           | 0.882 | 0.901 | 0.901            | 0.882 | 0.882 | 0.856            | 0.857 | 0.881 | 0.881            |       |       |                  |       |     |
| 0.03   | 0.2    | 0.3      | 20  | 14  | 5   | 0.897             | 0.908           | 0.896 | 0.911 | 0.912            | 0.891 | 0.892 | 0.870            | 0.870 | 0.893 | 0.893            |       |       |                  |       |     |
| 0.03   | 0.2    | 0.4      | 21  | 8   | 4   | 0.875             | 0.882           | 0.870 | 0.887 | 0.887            | 0.866 | 0.866 | 0.840            | 0.840 | 0.866 | 0.866            |       |       |                  |       |     |
| 0.03   | 0.2    | 0.5      | 15  | 8   | 4   | 0.907             | 0.910           | 0.896 | 0.917 | 0.917            | 0.895 | 0.896 | 0.868            | 0.868 | 0.896 | 0.896            |       |       |                  |       |     |
| 0.03   | 0.8    | 0.2      | 16  | 12  | 5   | 0.886             | 0.893           | 0.881 | 0.899 | 0.899            | 0.873 | 0.873 | 0.842            | 0.842 | 0.873 | 0.873            |       |       |                  |       |     |
| 0.03   | 0.8    | 0.2      | 24  | 7   | 5   | 0.882             | 0.885           | 0.877 | 0.891 | 0.892            | 0.875 | 0.875 | 0.857            | 0.858 | 0.874 | 0.875            |       |       |                  |       |     |
| 0.03   | 0.8    | 0.3      | 12  | 8   | 5   | 0.941             | 0.938           | 0.930 | 0.943 | 0.945            | 0.920 | 0.923 | 0.892            | 0.895 | 0.919 | 0.922            |       |       |                  |       |     |
| 0.03   | 0.8    | 0.4      | 12  | 5   | 4   | 0.952             | 0.949           | 0.943 | 0.957 | 0.958            | 0.938 | 0.940 | 0.912            | 0.914 | 0.936 | 0.937            |       |       |                  |       |     |
| 0.03   | 0.8    | 0.5      | 10  | 5   | 3   | 0.946             | 0.950           | 0.938 | 0.957 | 0.957            | 0.935 | 0.935 | 0.898            | 0.898 | 0.922 | 0.922            |       |       |                  |       |     |
| 0.10   | 0.2    | 0.3      | 21  | 11  | 8   | 0.878             | 0.885           | 0.872 | 0.893 | 0.893            | 0.874 | 0.874 | 0.850            | 0.850 | 0.877 | 0.877            |       |       |                  |       |     |
| 0.10   | 0.2    | 0.3      | 24  | 11  | 7   | 0.878             | 0.887           | 0.872 | 0.890 | 0.890            | 0.874 | 0.874 | 0.852            | 0.852 | 0.876 | 0.877            |       |       |                  |       |     |
| 0.10   | 0.2    | 0.4      | 15  | 16  | 6   | 0.906             | 0.917           | 0.894 | 0.919 | 0.919            | 0.897 | 0.896 | 0.864            | 0.864 | 0.899 | 0.898            |       |       |                  |       |     |
| 0.10   | 0.2    | 0.4      | 18  | 8   | 7   | 0.916             | 0.927           | 0.914 | 0.930 | 0.930            | 0.911 | 0.911 | 0.889            | 0.889 | 0.914 | 0.914            |       |       |                  |       |     |
| 0.10   | 0.2    | 0.5      | 16  | 7   | 5   | 0.886             | 0.898           | 0.878 | 0.905 | 0.905            | 0.880 | 0.880 | 0.850            | 0.851 | 0.882 | 0.882            |       |       |                  |       |     |
| 0.10   | 0.8    | 0.2      | 20  | 18  | 5   | 0.861             | 0.873           | 0.856 | 0.879 | 0.879            | 0.855 | 0.855 | 0.831            | 0.831 | 0.855 | 0.855            |       |       |                  |       |     |
| 0.10   | 0.8    | 0.3      | 15  | 9   | 4   | 0.895             | 0.901           | 0.885 | 0.905 | 0.905            | 0.880 | 0.880 | 0.849            | 0.849 | 0.877 | 0.877            |       |       |                  |       |     |
| 0.10   | 0.8    | 0.4      | 10  | 20  | 3   | 0.944             | 0.954           | 0.937 | 0.959 | 0.959            | 0.935 | 0.936 | 0.899            | 0.900 | 0.922 | 0.922            |       |       |                  |       |     |
| 0.10   | 0.8    | 0.4      | 12  | 5   | 5   | 0.932             | 0.934           | 0.926 | 0.940 | 0.941            | 0.917 | 0.919 | 0.886            | 0.888 | 0.916 | 0.918            |       |       |                  |       |     |
| 0.10   | 0.8    | 0.5      | 9   | 7   | 4   | 0.973             | 0.974           | 0.967 | 0.976 | 0.976            | 0.961 | 0.961 | 0.930            | 0.931 | 0.959 | 0.959            |       |       |                  |       |     |

<sup>a</sup> Pred: Predicted power.

<sup>b</sup> MB: Model-based variance.

<sup>c</sup> BC0: Uncorrected sandwich variance of Liang and Zeger (1986).

<sup>d</sup> BC1: Bias-corrected sandwich variance of Kauermann and Carroll (2001).

<sup>e</sup> BC2: Bias-corrected sandwich variance of Mancl and DeRouen (2001).

<sup>f</sup> BC3: Bias-corrected sandwich variance of Fay and Graubard (2001).

**Web Table 8** Simulation scenarios, predicted power, along with the empirical power corresponding to the QLS  $t$ -tests and MAQLS  $t$ -test with different variance estimators. The degrees of freedom is set to be  $\text{DoF} = I - 2$ . Differences from the prediction within 0.008 are considered acceptable based on the margin of error from a binomial model with 10000 Monte Carlo replications.

| $\tau$ | $\rho$ | $\delta$ | $I$ | $N$ | $T$ | Pred <sup>a</sup> | MB <sup>b</sup> |       |       | BC0 <sup>c</sup> |       |       | BC1 <sup>d</sup> |       |       | BC2 <sup>e</sup> |     |       | BC3 <sup>f</sup> |       |     |
|--------|--------|----------|-----|-----|-----|-------------------|-----------------|-------|-------|------------------|-------|-------|------------------|-------|-------|------------------|-----|-------|------------------|-------|-----|
|        |        |          |     |     |     |                   | QLS             | MAQLS | QLS   | MAQLS            | QLS   | MAQLS | QLS              | MAQLS | QLS   | MAQLS            | QLS | MAQLS | QLS              | MAQLS | QLS |
| 0.03   | 0.2    | 0.3      | 18  | 10  | 7   | 0.860             | 0.879           | 0.862 | 0.883 | 0.884            | 0.859 | 0.859 | 0.825            | 0.826 | 0.861 | 0.862            |     |       |                  |       |     |
| 0.03   | 0.2    | 0.3      | 18  | 24  | 4   | 0.844             | 0.869           | 0.849 | 0.876 | 0.876            | 0.849 | 0.849 | 0.819            | 0.819 | 0.848 | 0.848            |     |       |                  |       |     |
| 0.03   | 0.2    | 0.3      | 20  | 14  | 5   | 0.862             | 0.883           | 0.865 | 0.887 | 0.887            | 0.863 | 0.864 | 0.836            | 0.837 | 0.865 | 0.865            |     |       |                  |       |     |
| 0.03   | 0.2    | 0.4      | 21  | 8   | 4   | 0.839             | 0.855           | 0.838 | 0.860 | 0.860            | 0.834 | 0.834 | 0.807            | 0.807 | 0.833 | 0.833            |     |       |                  |       |     |
| 0.03   | 0.2    | 0.5      | 15  | 8   | 4   | 0.859             | 0.875           | 0.857 | 0.890 | 0.890            | 0.857 | 0.857 | 0.816            | 0.817 | 0.856 | 0.856            |     |       |                  |       |     |
| 0.03   | 0.8    | 0.2      | 16  | 12  | 5   | 0.838             | 0.860           | 0.839 | 0.863 | 0.863            | 0.831 | 0.832 | 0.794            | 0.794 | 0.832 | 0.832            |     |       |                  |       |     |
| 0.03   | 0.8    | 0.2      | 24  | 7   | 5   | 0.852             | 0.862           | 0.854 | 0.869 | 0.870            | 0.851 | 0.852 | 0.827            | 0.829 | 0.851 | 0.852            |     |       |                  |       |     |
| 0.03   | 0.8    | 0.3      | 12  | 8   | 5   | 0.887             | 0.901           | 0.891 | 0.912 | 0.914            | 0.880 | 0.884 | 0.838            | 0.840 | 0.882 | 0.884            |     |       |                  |       |     |
| 0.03   | 0.8    | 0.4      | 12  | 5   | 4   | 0.903             | 0.918           | 0.908 | 0.930 | 0.931            | 0.898 | 0.900 | 0.862            | 0.863 | 0.895 | 0.897            |     |       |                  |       |     |
| 0.03   | 0.8    | 0.5      | 10  | 5   | 3   | 0.878             | 0.905           | 0.887 | 0.921 | 0.921            | 0.875 | 0.875 | 0.818            | 0.819 | 0.855 | 0.854            |     |       |                  |       |     |
| 0.10   | 0.2    | 0.3      | 21  | 11  | 8   | 0.843             | 0.859           | 0.841 | 0.869 | 0.869            | 0.844 | 0.844 | 0.815            | 0.815 | 0.847 | 0.847            |     |       |                  |       |     |
| 0.10   | 0.2    | 0.3      | 24  | 11  | 7   | 0.848             | 0.863           | 0.848 | 0.868 | 0.868            | 0.849 | 0.849 | 0.826            | 0.826 | 0.851 | 0.851            |     |       |                  |       |     |
| 0.10   | 0.2    | 0.4      | 15  | 16  | 6   | 0.858             | 0.881           | 0.851 | 0.888 | 0.888            | 0.855 | 0.855 | 0.817            | 0.817 | 0.859 | 0.859            |     |       |                  |       |     |
| 0.10   | 0.2    | 0.4      | 18  | 8   | 7   | 0.879             | 0.902           | 0.883 | 0.906 | 0.906            | 0.882 | 0.883 | 0.854            | 0.854 | 0.885 | 0.886            |     |       |                  |       |     |
| 0.10   | 0.2    | 0.5      | 16  | 7   | 5   | 0.838             | 0.861           | 0.837 | 0.873 | 0.872            | 0.840 | 0.841 | 0.802            | 0.803 | 0.843 | 0.844            |     |       |                  |       |     |
| 0.10   | 0.8    | 0.2      | 20  | 18  | 5   | 0.821             | 0.841           | 0.818 | 0.848 | 0.847            | 0.821 | 0.821 | 0.788            | 0.788 | 0.820 | 0.820            |     |       |                  |       |     |
| 0.10   | 0.8    | 0.3      | 15  | 9   | 4   | 0.845             | 0.864           | 0.843 | 0.870 | 0.870            | 0.836 | 0.837 | 0.796            | 0.796 | 0.833 | 0.833            |     |       |                  |       |     |
| 0.10   | 0.8    | 0.4      | 10  | 20  | 3   | 0.875             | 0.912           | 0.879 | 0.920 | 0.921            | 0.881 | 0.881 | 0.820            | 0.821 | 0.856 | 0.857            |     |       |                  |       |     |
| 0.10   | 0.8    | 0.4      | 12  | 5   | 5   | 0.875             | 0.897           | 0.882 | 0.905 | 0.907            | 0.871 | 0.872 | 0.825            | 0.828 | 0.871 | 0.872            |     |       |                  |       |     |
| 0.10   | 0.8    | 0.5      | 9   | 7   | 4   | 0.914             | 0.942           | 0.924 | 0.948 | 0.949            | 0.910 | 0.911 | 0.855            | 0.856 | 0.906 | 0.907            |     |       |                  |       |     |

<sup>a</sup> Pred: Predicted power.

<sup>b</sup> MB: Model-based variance.

<sup>c</sup> BC0: Uncorrected sandwich variance of Liang and Zeger (1986).

<sup>d</sup> BC1: Bias-corrected sandwich variance of Kauermann and Carroll (2001).

<sup>e</sup> BC2: Bias-corrected sandwich variance of Mancl and DeRouen (2001).

<sup>f</sup> BC3: Bias-corrected sandwich variance of Fay and Graubard (2001).

**Web Table 9** Simulation scenarios, predicted power, along with the empirical power corresponding to the QLS  $t$ -tests and MAQLS  $t$ -test with different variance estimators. The degrees of freedom is set to be  $\text{DoF} = I - (T + 1)$ . Differences from the prediction within 0.008 are considered acceptable based on the margin of error from a binomial model with 10000 Monte Carlo replications.

| $\tau$ | $\rho$ | $\delta$ | $I$ | $N$ | $T$ | Pred <sup>a</sup> | MB <sup>b</sup> |       |       | BC0 <sup>c</sup> |       |       | BC1 <sup>d</sup> |       |       | BC2 <sup>e</sup> |       |       | BC3 <sup>f</sup> |       |     |
|--------|--------|----------|-----|-----|-----|-------------------|-----------------|-------|-------|------------------|-------|-------|------------------|-------|-------|------------------|-------|-------|------------------|-------|-----|
|        |        |          |     |     |     |                   | QLS             | MAQLS | QLS   | MAQLS            | QLS   | MAQLS | QLS              | MAQLS | QLS   | MAQLS            | QLS   | MAQLS | QLS              | MAQLS | QLS |
| 0.03   | 0.2    | 0.3      | 18  | 10  | 7   | 0.832             | 0.857           | 0.836 | 0.864 | 0.864            | 0.833 | 0.833 | 0.798            | 0.799 | 0.837 | 0.837            | 0.837 | 0.837 | 0.837            | 0.837 |     |
| 0.03   | 0.2    | 0.3      | 18  | 24  | 4   | 0.833             | 0.863           | 0.840 | 0.868 | 0.869            | 0.840 | 0.840 | 0.806            | 0.807 | 0.839 | 0.839            | 0.839 | 0.839 | 0.839            |       |     |
| 0.03   | 0.2    | 0.3      | 20  | 14  | 5   | 0.850             | 0.873           | 0.854 | 0.879 | 0.880            | 0.854 | 0.854 | 0.825            | 0.825 | 0.856 | 0.856            | 0.856 | 0.856 | 0.856            |       |     |
| 0.03   | 0.2    | 0.4      | 21  | 8   | 4   | 0.831             | 0.848           | 0.832 | 0.855 | 0.855            | 0.827 | 0.827 | 0.799            | 0.799 | 0.827 | 0.827            | 0.827 | 0.827 | 0.827            |       |     |
| 0.03   | 0.2    | 0.5      | 15  | 8   | 4   | 0.842             | 0.864           | 0.842 | 0.877 | 0.877            | 0.841 | 0.841 | 0.800            | 0.800 | 0.840 | 0.840            | 0.840 | 0.840 | 0.840            |       |     |
| 0.03   | 0.8    | 0.2      | 16  | 12  | 5   | 0.815             | 0.838           | 0.817 | 0.845 | 0.845            | 0.812 | 0.811 | 0.768            | 0.768 | 0.811 | 0.811            | 0.811 | 0.811 | 0.811            |       |     |
| 0.03   | 0.8    | 0.2      | 24  | 7   | 5   | 0.845             | 0.857           | 0.849 | 0.864 | 0.865            | 0.844 | 0.845 | 0.820            | 0.820 | 0.844 | 0.844            | 0.844 | 0.844 | 0.844            |       |     |
| 0.03   | 0.8    | 0.3      | 12  | 8   | 5   | 0.838             | 0.864           | 0.847 | 0.880 | 0.883            | 0.836 | 0.838 | 0.784            | 0.786 | 0.837 | 0.840            | 0.837 | 0.840 | 0.840            |       |     |
| 0.03   | 0.8    | 0.4      | 12  | 5   | 4   | 0.876             | 0.899           | 0.883 | 0.911 | 0.913            | 0.876 | 0.878 | 0.827            | 0.828 | 0.873 | 0.875            | 0.873 | 0.875 | 0.875            |       |     |
| 0.03   | 0.8    | 0.5      | 10  | 5   | 3   | 0.847             | 0.881           | 0.857 | 0.899 | 0.898            | 0.847 | 0.847 | 0.778            | 0.778 | 0.822 | 0.822            | 0.822 | 0.822 | 0.822            |       |     |
| 0.10   | 0.2    | 0.3      | 21  | 11  | 8   | 0.819             | 0.841           | 0.820 | 0.850 | 0.849            | 0.821 | 0.822 | 0.792            | 0.792 | 0.826 | 0.826            | 0.826 | 0.826 | 0.826            |       |     |
| 0.10   | 0.2    | 0.3      | 24  | 11  | 7   | 0.835             | 0.854           | 0.837 | 0.859 | 0.858            | 0.838 | 0.838 | 0.814            | 0.814 | 0.841 | 0.841            | 0.841 | 0.841 | 0.841            |       |     |
| 0.10   | 0.2    | 0.4      | 15  | 16  | 6   | 0.820             | 0.850           | 0.811 | 0.860 | 0.859            | 0.823 | 0.822 | 0.774            | 0.774 | 0.828 | 0.827            | 0.828 | 0.827 | 0.827            |       |     |
| 0.10   | 0.2    | 0.4      | 18  | 8   | 7   | 0.853             | 0.879           | 0.856 | 0.887 | 0.887            | 0.861 | 0.861 | 0.827            | 0.827 | 0.864 | 0.864            | 0.864 | 0.864 | 0.864            |       |     |
| 0.10   | 0.2    | 0.5      | 16  | 7   | 5   | 0.815             | 0.841           | 0.817 | 0.856 | 0.857            | 0.821 | 0.821 | 0.777            | 0.777 | 0.823 | 0.824            | 0.823 | 0.824 | 0.824            |       |     |
| 0.10   | 0.8    | 0.2      | 20  | 18  | 5   | 0.808             | 0.830           | 0.806 | 0.840 | 0.839            | 0.808 | 0.808 | 0.776            | 0.776 | 0.808 | 0.808            | 0.808 | 0.808 | 0.808            |       |     |
| 0.10   | 0.8    | 0.3      | 15  | 9   | 4   | 0.826             | 0.849           | 0.826 | 0.856 | 0.856            | 0.820 | 0.820 | 0.777            | 0.778 | 0.817 | 0.817            | 0.817 | 0.817 | 0.817            |       |     |
| 0.10   | 0.8    | 0.4      | 10  | 20  | 3   | 0.843             | 0.889           | 0.849 | 0.900 | 0.901            | 0.849 | 0.850 | 0.779            | 0.781 | 0.823 | 0.824            | 0.823 | 0.824 | 0.824            |       |     |
| 0.10   | 0.8    | 0.4      | 12  | 5   | 5   | 0.823             | 0.854           | 0.833 | 0.870 | 0.871            | 0.824 | 0.826 | 0.764            | 0.767 | 0.824 | 0.826            | 0.824 | 0.826 | 0.826            |       |     |
| 0.10   | 0.8    | 0.5      | 9   | 7   | 4   | 0.835             | 0.884           | 0.852 | 0.897 | 0.898            | 0.833 | 0.834 | 0.743            | 0.744 | 0.825 | 0.825            | 0.825 | 0.825 | 0.825            |       |     |

<sup>a</sup> Pred: Predicted power.

<sup>b</sup> MB: Model-based variance.

<sup>c</sup> BC0: Uncorrected sandwich variance of Liang and Zeger (1986).

<sup>d</sup> BC1: Bias-corrected sandwich variance of Kauermann and Carroll (2001).

<sup>e</sup> BC2: Bias-corrected sandwich variance of Mancl and DeRouen (2001).

<sup>f</sup> BC3: Bias-corrected sandwich variance of Fay and Graubard (2001).

**WEB APPENDIX E: WEB FIGURES**

|           | $t = 1$ | $t = 2$ | $t = 3$   | $t = 4$   | $t = 5$ | $t = 6$   |
|-----------|---------|---------|-----------|-----------|---------|-----------|
|           |         |         | $s = 1$   | $s = 2$   |         | $s = 3$   |
| cluster 1 | 0       | 0       | 1         | 1         | 1       | 1         |
| cluster 2 | 0       | 0       | 1         | 1         | 1       | 1         |
| cluster 3 | 0       | 0       | 0         | 1         | 1       | 1         |
| cluster 4 | 0       | 0       | 0         | 1         | 1       | 1         |
| cluster 5 | 0       | 0       | 0         | 0         | 0       | 1         |
| cluster 6 | 0       | 0       | 0         | 0         | 0       | 1         |
|           | $b = 2$ |         | $c_1 = 1$ | $c_2 = 2$ |         | $c_3 = 1$ |

**Web Figure 1** A schematic illustration of a stepped wedge design with  $I = 6$  clusters and  $T = 6$  periods, with  $b = 2$  baseline periods,  $c_1 = c_3 = 1$  and  $c_2 = 2$ . Each cell with a zero entry indicates a control cluster-period and each cell with a one entry indicates an intervention cluster-period.

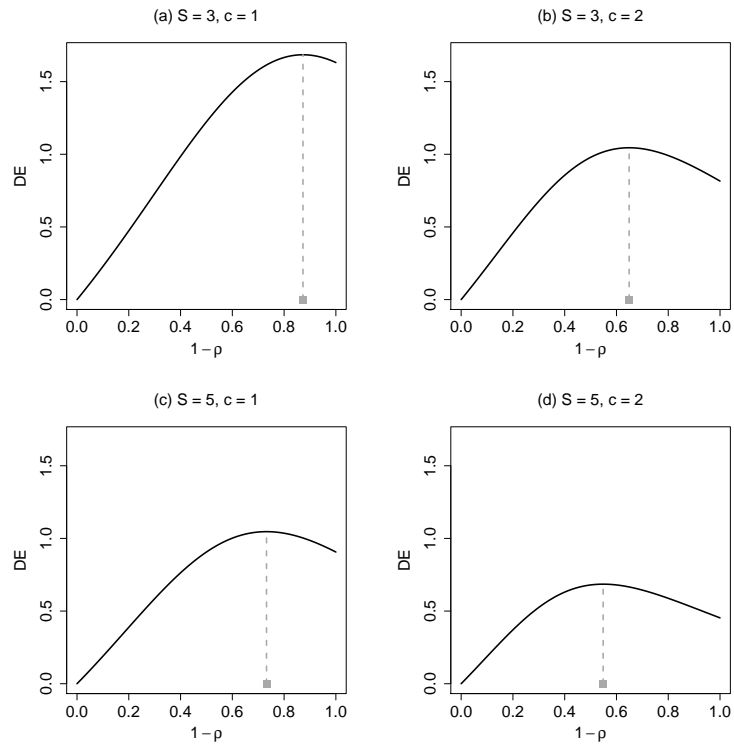

**Web Figure 2** The design effect as a function of the degree of correlation decay, defined as  $1 - \rho$ . The x-axis is  $1 - \rho$  so that the degree of decay increases from left to right. For illustration, the cohort size and the within-period correlation are fixed at  $N = 20$  and  $\tau = 0.1$ . Corresponding to the analytical result in Section 4.2, the maximum design effect is attained when  $\rho = r$  (gray square dot), a value between 0 and 1 and determined by the number of steps  $S$  and the number of measurements between steps  $c$ .

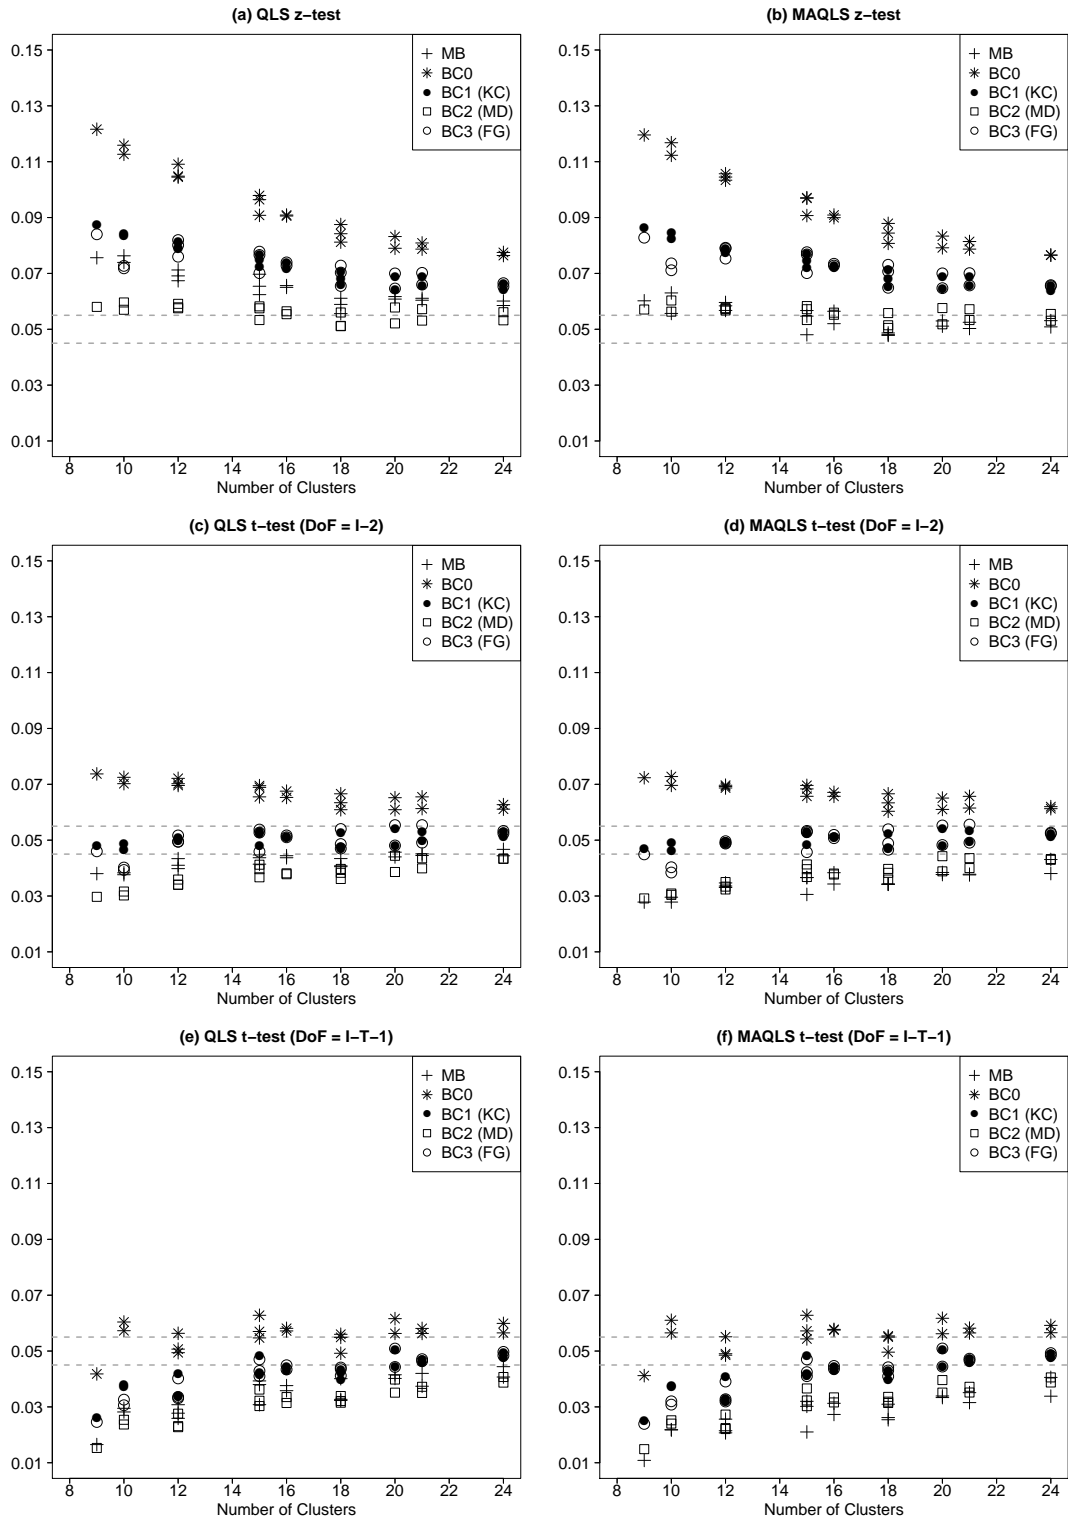

**Web Figure 3** Empirical type I error rates for (a) QLS z-tests, (b) MAQLS z-tests, (c) QLS t-tests with  $\text{DoF} = I - 2$ , (d) MAQLS t-tests with  $\text{DoF} = I - 2$ , (e) QLS t-tests with  $\text{DoF} = I - (T + 1)$  and (f) MAQLS t-tests with  $\text{DoF} = I - (T + 1)$ . MB: model-based variance; BC0: uncorrected sandwich variance; BC1: KC-corrected sandwich variance; BC2: MD-corrected sandwich variance; BC3: FG-corrected sandwich variance. The acceptable bounds are shown with the dashed horizontal lines. For each value of  $I$ , there may be multiple points with the same symbol indicating results with different combinations of design resources and correlation parameters.

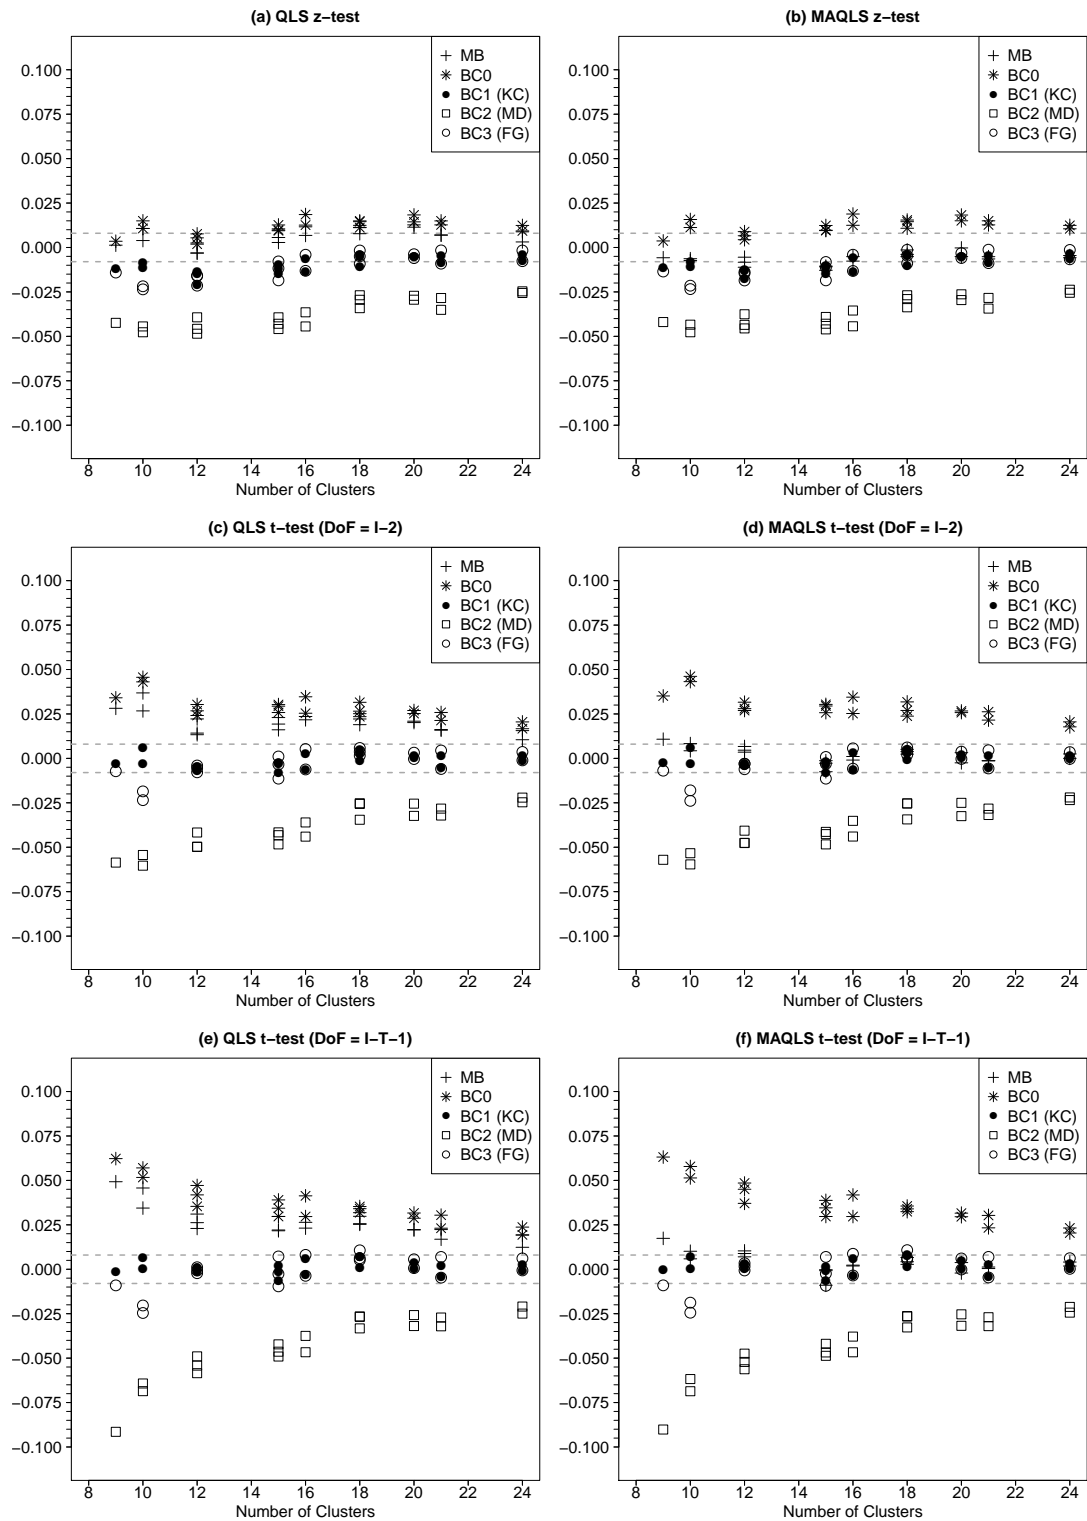

**Web Figure 4** Differences between the empirical power and the predicted power of (a) QLS z-tests, (b) MAQLS z-tests, (c) QLS t-tests with  $\text{DoF} = I - 2$ , (d) MAQLS t-tests with  $\text{DoF} = I - 2$ , (e) QLS t-tests with  $\text{DoF} = I - (T + 1)$  and (f) MAQLS t-tests with  $\text{DoF} = I - (T + 1)$ . MB: model-based variance; BC0: uncorrected sandwich variance; BC1: KC-corrected sandwich variance; BC2: MD-corrected sandwich variance; BC3: FG-corrected sandwich variance. The acceptable bounds are shown with the dashed horizontal lines. For each value of  $I$ , there may be multiple points with the same symbol indicating results with different combinations of design resources and correlation parameters.



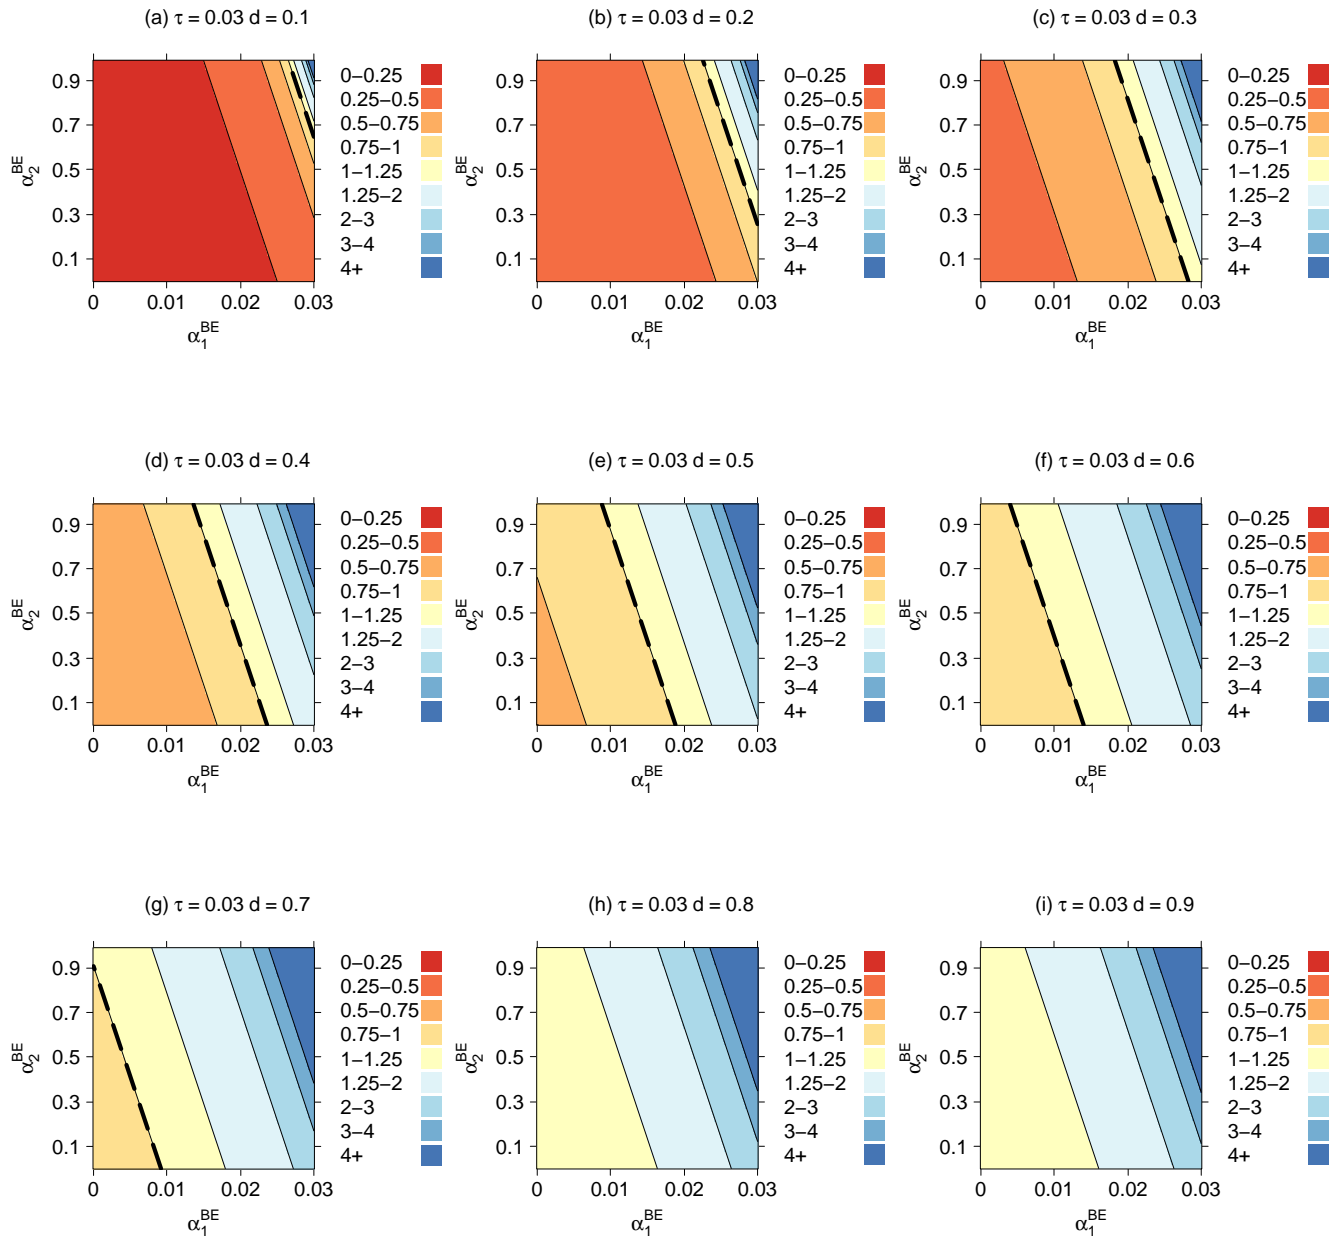

**Web Figure 5** Contour plots for the relative variance obtained under the proportional decay correlation model and the block exchangeable correlation model, for varying values of the proportional decay model decay parameter  $d$  and the block exchangeable model correlation parameters  $\alpha_1^{\text{BE}}$ ,  $\alpha_2^{\text{BE}}$ . In all panels, the within-period correlation  $\tau = 0.03$ , the number of periods  $T = 4$  and the cohort size  $N = 100$ . The dashed thick line indicates the equality of variances.

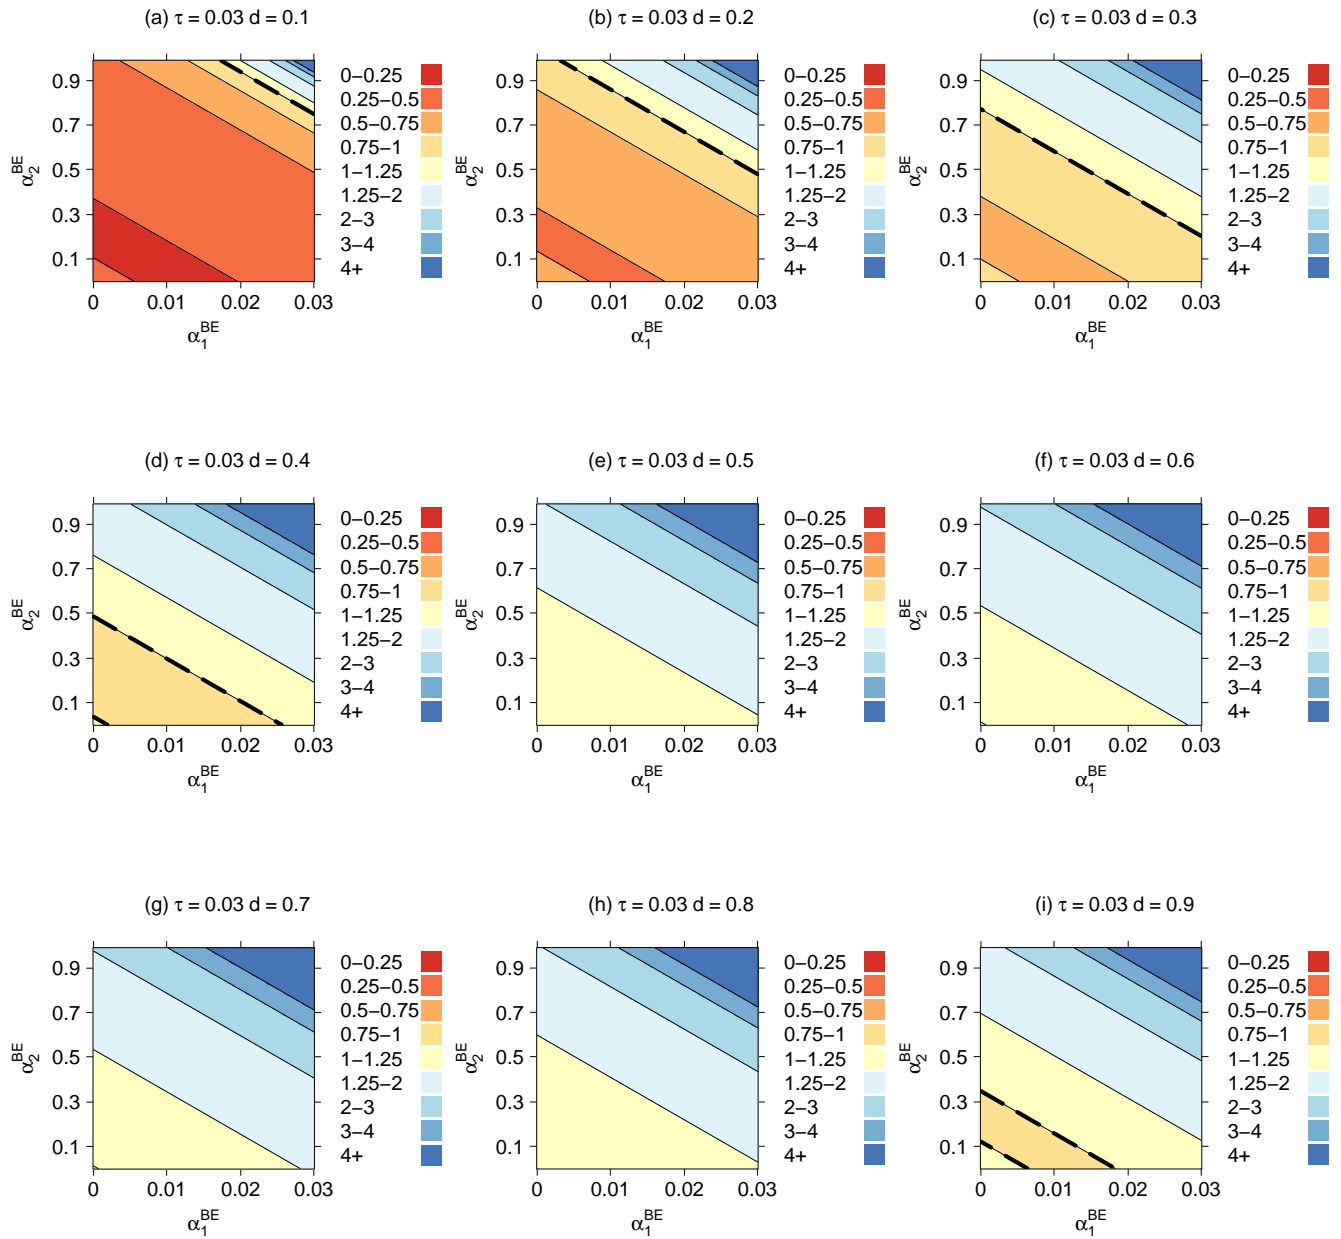

**Web Figure 6** Contour plots for the relative variance obtained under the proportional decay correlation model and the block exchangeable correlation model, for varying values of the proportional decay model decay parameter  $d$  and the block exchangeable correlation parameters  $\alpha_1^{\text{BE}}$ ,  $\alpha_2^{\text{BE}}$ . In all panels, the within-period correlation  $\tau = 0.03$ , the number of periods  $T = 8$  and the cohort size  $N = 20$ . The dashed thick line indicates the equality of variances.

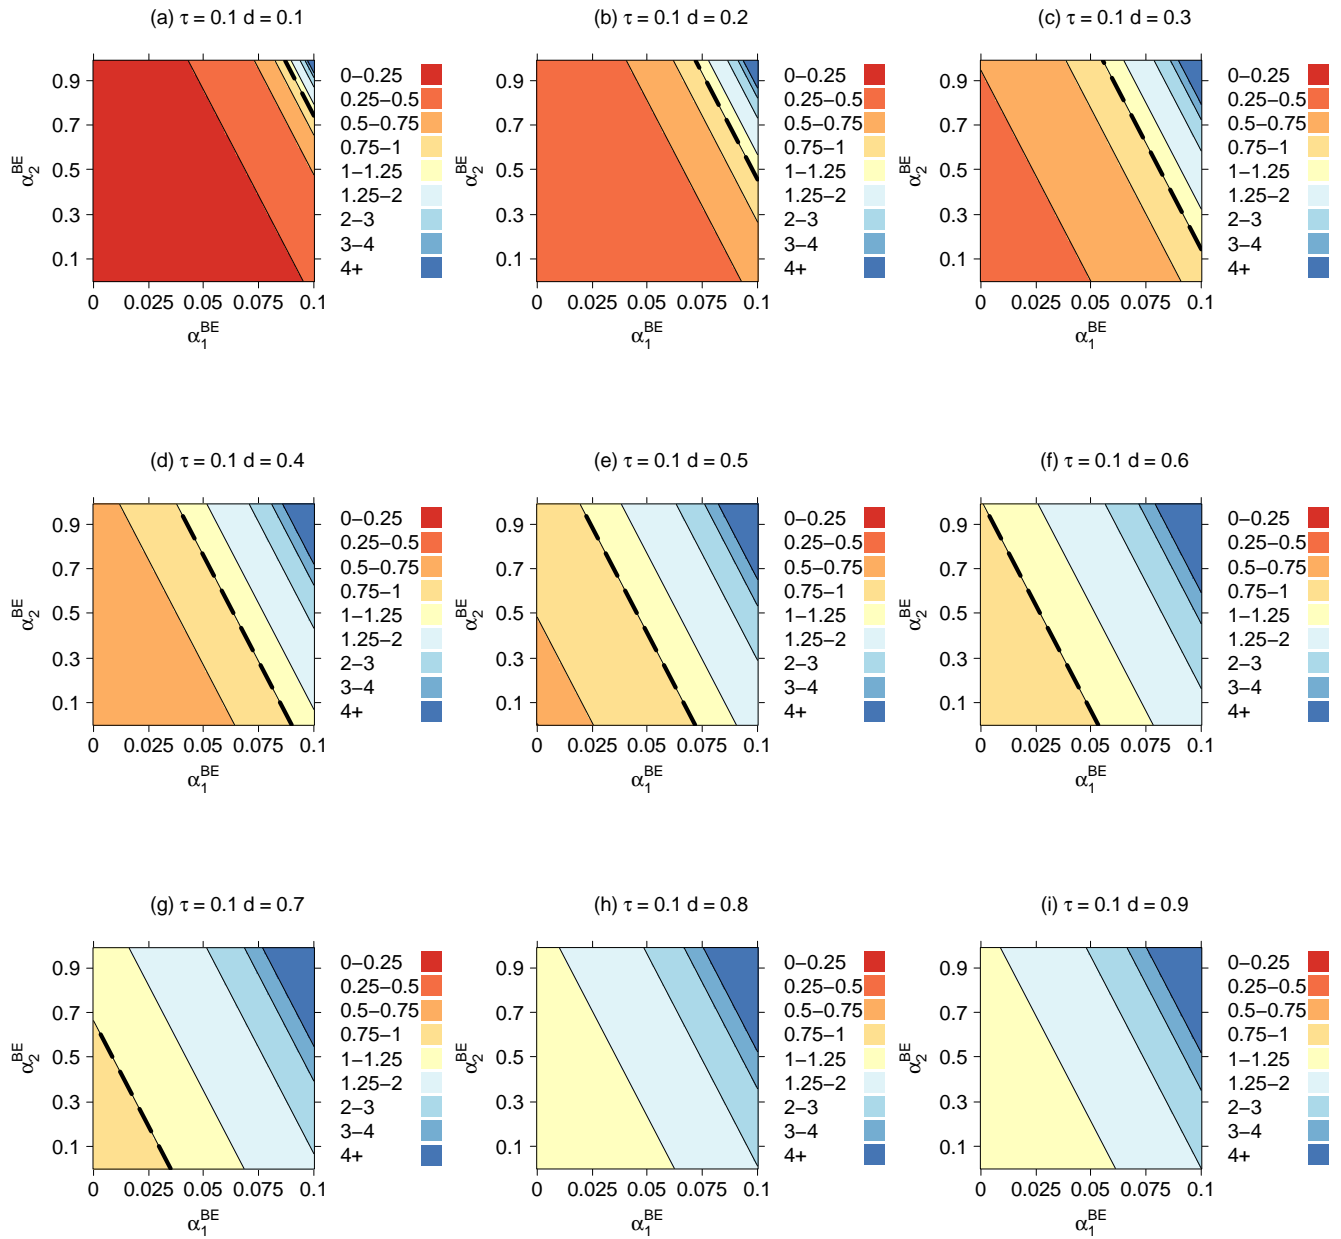

**Web Figure 7** Contour plots for the relative variance obtained under the proportional decay correlation model and the block exchangeable correlation model, for varying values of the proportional decay model decay parameter  $d$  and the block exchangeable correlation parameters  $\alpha_1^{\text{BE}}$ ,  $\alpha_2^{\text{BE}}$ . In all panels, the within-period correlation  $\tau = 0.1$ , the number of periods  $T = 4$  and the cohort size  $N = 20$ . The dashed thick line indicates the equality of variances.

---

## References

1. Shults J., Morrow A. L.. Use of quasi-least squares to adjust for two levels of correlation. *Biometrics*. 2002;58(3):521–530.
2. Preisser J. S., Lu B., Qaqish B. F.. Finite sample adjustments in estimating equations and covariance estimators for intracluster correlations. *Statistics in Medicine*. 2008;27(8):5764–5785.
3. Li F., Turner E. L., Preisser J. S.. Sample size determination for GEE analyses of stepped wedge cluster randomized trials. *Biometrics*. 2018;74(4):1450–1458.
4. Rochon J.. Application of GEE procedures for sample size calculations in repeated measures experiments. *Statistics in Medicine*. 1998;17(14):1643–1658.

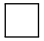

Supplement: NIHMS1556743-supplement-Li_2019_Supp.pdf [file NIHMS1556743-supplement-Li_2019_Supp.pdf]
